# Supplementary material
Source: PubMed Central journal article supplement (PMC8014715)
Supplement: ENE-28-3478-s001.pdf [file ENE-28-3478-s001.pdf]

## SUPPORTING INFORMATION

---

This supplementary material contains:

- Search string replicable in PubMed
  - Table 1. Excluded studies with respective reason.
  - Table 2. Risk of bias assessment
  - Table 3. Sensitivity analysis
  - Table 4. Laboratory findings of included cases
  - Figure 1. Funnel plots for studies addressing cerebral venous thrombosis among patients hospitalized with SARS-CoV-2 (A) and among patients hospitalized with SARS-CoV-2 infection and referred with a cerebrovascular event (B)
  - References for supplementary material
- 

### **Search String for PubMed:**

("COVID"[All Fields] OR "coronavirus"[All Fields] OR "SARS-Cov-2"[All Fields] OR "coronavirus" [MeSH Terms]) AND ("sinus thrombosis, intracranial"[MeSH Terms] OR "cerebral venous thrombosis"[All Fields] OR "cerebral venous thrombosis" [All Fields] OR "cranial sinus thrombosis" [All Fields]).

Search was limited to humans, 1<sup>st</sup> January 2020 – 1<sup>st</sup> September 2020.

**Supplementary material Table 1. Excluded studies with respective reason.**

| <b>Author</b>               | <b>Year</b> | <b>Reason for exclusion/details</b>                                                       |
|-----------------------------|-------------|-------------------------------------------------------------------------------------------|
| Benger <sup>1</sup>         | 2020        | no CVT reported, only intraparenchymal hemorrhage, normal CT angiography in all cases     |
| Bhatia <sup>2</sup>         | 2020        | no original data                                                                          |
| Cheruiyot <sup>3</sup>      | 2020        | review on arterial thrombosis                                                             |
| Chougar <sup>4</sup>        | 2020        | no original data on CVT (only 1 case already published)                                   |
| Divani <sup>5</sup>         | 2020        | review, no CVT reported                                                                   |
| Elnahry <sup>6</sup>        | 2020        | no original data                                                                          |
| Etkin <sup>7</sup>          | 2020        | no CVT reported                                                                           |
| Fara <sup>8</sup>           | 2020        | no CVT reported                                                                           |
| Fatima <sup>9</sup>         | 2020        | no original data                                                                          |
| Favas <sup>10</sup>         | 2020        | review, no original data                                                                  |
| Jiménez-Ruiz <sup>11</sup>  | 2020        | no original data                                                                          |
| Kadono <sup>12</sup>        | 2020        | CVT and epilepsy presented 6 months before COVID                                          |
| Klein <sup>13</sup>         | 2020        | no original data                                                                          |
| Klok <sup>14</sup>          | 2020        | no CVT reported, study of incidence of thrombotic complications in severe COVID infection |
| Klok <sup>15</sup>          | 2020        | no CVT reported                                                                           |
| Koralnik <sup>16</sup>      | 2020        | review, no original data                                                                  |
| Kow <sup>17</sup>           | 2020        | no original data                                                                          |
| Kremer <sup>18</sup>        | 2020        | venous thrombosis is an exclusion criteria, only non-vascular lesions                     |
| Kulick-Soper <sup>19</sup>  | 2020        | case report on hypoxic-ischemic brain injury                                              |
| Li <sup>20</sup>            | 2020        | no CVT reported                                                                           |
| Lodigiani <sup>21</sup>     | 2020        | no CVT reported, only DVT/MI                                                              |
| Manolis <sup>22</sup>       | 2020        | review (no original data)                                                                 |
| Mi <sup>23</sup>            | 2020        | no CVT reported, only DVT (deep venous thrombosis)                                        |
| Patel <sup>24</sup>         | 2020        | no CVT reported (case report on cerebellar infarction)                                    |
| Román <sup>25</sup>         | 2020        | review, no original data                                                                  |
| Roy-Gash <sup>26</sup>      | 2020        | duplicate                                                                                 |
| Shakibajhromi <sup>27</sup> | 2020        | no original data on CVT                                                                   |
| Speeckaert <sup>28</sup>    | 2020        | no original data                                                                          |
| Suri <sup>29</sup>          | 2020        | review, no CVT reported                                                                   |
| Sweid <sup>30</sup>         | 2020        | case series with ischemic stroke, aneurysm and CVT, no data available                     |
| Vinayagam <sup>31</sup>     | 2020        | Review on thrombophilia in COVID-19, CVT not specifically reported                        |
| Warkentin <sup>32</sup>     | 2020        | review (no original data)                                                                 |
| Zavras <sup>33</sup>        | 2020        | no CVT reported                                                                           |
| Zhou <sup>34</sup>          | 2020        | review, no original data                                                                  |

Legend. CT: computerized tomography; CVT: cerebral venous thrombosis; DVT: deep venous thrombosis; MI: myocardial infarction.

Supplementary material Table 2. Risk of bias assessment

| Author                    | Year | Selection          |                         | Ascertainment             |                     | Comparability | Outcome and reporting |                  |                           | Score | Overall quality |
|---------------------------|------|--------------------|-------------------------|---------------------------|---------------------|---------------|-----------------------|------------------|---------------------------|-------|-----------------|
|                           |      | Representativeness | Selection of the cohort | Ascertainment of exposure | Baseline assessment |               | Assessment of outcome | Follow-up length | Adequacy of ascertainment |       |                 |
| Baudar <sup>35</sup>      | 2020 | 0                  | 1                       | 1                         | 1                   | 0             | 1                     | 0                | 0                         | 4     | low             |
| Bolaji <sup>36</sup>      | 2020 | 0                  | 1                       | 1                         | 1                   | 0             | 1                     | 1                | 0                         | 5     | low             |
| Cavalcanti <sup>37</sup>  | 2020 | 0                  | 1                       | 1                         | 1                   | 0             | 1                     | 1                | 1                         | 6     | moderate        |
| Chougar <sup>38</sup>     | 2020 | 0                  | 1                       | 1                         | 1                   | 0             | 1                     | 1                | 0                         | 5     | low             |
| Chow <sup>39</sup>        | 2020 | 0                  | 1                       | 1                         | 1                   | 0             | 1                     | 1                | 0                         | 5     | low             |
| Dahl-Cruz <sup>40</sup>   | 2020 | 0                  | 1                       | 1                         | 1                   | 0             | 1                     | 0                | 0                         | 4     | low             |
| Essajee <sup>41</sup>     | 2020 | 0                  | 1                       | 1                         | 1                   | 0             | 1                     | 1                | 0                         | 5     | low             |
| Garaci <sup>42</sup>      | 2020 | 0                  | 1                       | 1                         | 1                   | 0             | 0                     | 0                | 0                         | 3     | low             |
| Haroon <sup>43</sup>      | 2020 | 0                  | 1                       | 1                         | 0                   | 0             | 0                     | 0                | 0                         | 2     | Low             |
| Hemasian <sup>44</sup>    | 2020 | 0                  | 1                       | 1                         | 1                   | 0             | 1                     | 0                | 0                         | 4     | low             |
| Hoelscher <sup>45</sup>   | 2020 | 0                  | 1                       | 1                         | 1                   | 0             | 1                     | 1                | 0                         | 5     | low             |
| Hughes <sup>46</sup>      | 2020 | 0                  | 1                       | 1                         | 1                   | 0             | 1                     | 0                | 0                         | 4     | low             |
| Kananeh <sup>47</sup>     | 2020 | 0                  | 1                       | 1                         | 0                   | 0             | 1                     | 1                | 1                         | 5     | low             |
| Keaney <sup>48</sup>      | 2020 | 0                  | 0                       | 0                         | 1                   | 0             | 1                     | 0                | 0                         | 2     | low             |
| Klein <sup>49</sup>       | 2020 | 0                  | 1                       | 1                         | 1                   | 0             | 1                     | 0                | 0                         | 4     | low             |
| Koh <sup>50</sup>         | 2020 | 1                  | 1                       | 1                         | 1                   | 0             | 1                     | 0                | 0                         | 5     | low             |
| Malentacchi <sup>51</sup> | 2020 | 0                  | 1                       | 1                         | 1                   | 0             | 1                     | 1                | 0                         | 5     | low             |
| Mowla <sup>52</sup>       | 2020 | 1                  | 1                       | 1                         | 1                   | 1             | 1                     | 0                | 0                         | 6     | moderate        |
| Poillon <sup>53</sup>     | 2020 | 0                  | 1                       | 1                         | 1                   | 0             | 1                     | 0                | 0                         | 4     | low             |
| Rifino <sup>54</sup>      | 2020 | 1                  | 1                       | 1                         | 1                   | 0             | 1                     | 0                | 0                         | 5     | low             |
| Rouyer <sup>55</sup>      | 2020 | 0                  | 1                       | 0                         | 0                   | 0             | 0                     | 0                | 0                         | 1     | low             |
| Roy-Gash <sup>56</sup>    | 2020 | 0                  | 1                       | 0                         | 1                   | 0             | 1                     | 1                | 0                         | 4     | low             |
| Shahjouei <sup>57</sup>   | 2020 | 1                  | 1                       | 1                         | 1                   | 0             | 1                     | 0                | 0                         | 5     | low             |
| Siegler <sup>58</sup>     | 2020 | 1                  | 1                       | 0                         | 1                   | 0             | 0                     | 0                | 0                         | 3     | low             |
| Sugiyama <sup>59</sup>    | 2020 | 0                  | 1                       | 1                         | 1                   | 0             | 1                     | 0                | 0                         | 4     | Low             |
| Thompson <sup>60</sup>    | 2020 | 0                  | 1                       | 0                         | 1                   | 0             | 1                     | 0                | 0                         | 3     | low             |
| Trimaille <sup>61</sup>   | 2020 | 1                  | 0                       | 1                         | 1                   | 0             | 1                     | 0                | 0                         | 4     | low             |
| Tu <sup>62</sup>          | 2020 | 0                  | 1                       | 1                         | 0                   | 0             | 1                     | 1                | 0                         | 4     | low             |

**Supplementary material – Table 3. Sensitivity analysis.**

| <b>Analysis</b>                           | <b>Lowest/highest prevalence (95%CI)</b> | <b>Study left out</b>                            | <b>I<sup>2</sup></b> | <b>P<sub>heterogeneity</sub></b> |
|-------------------------------------------|------------------------------------------|--------------------------------------------------|----------------------|----------------------------------|
| <b>CVT among patients hospitalized</b>    | 0.03 % (0.02-0.06)<br>0.13% (0.01-1.41)  | Trimaille <sup>61</sup><br>Siegler <sup>58</sup> | 0%<br>92%            | 0.64<br>0.006                    |
| <b>CVT among cerebrovascular diseases</b> | 2.82% (1.52-5.16)<br>5.67% (1.67-17.51)  | Koh <sup>50</sup><br>Siegler <sup>58</sup>       | 0%<br>70%            | 0.48<br>0.04                     |

Leave-one out paradigm applied to meta-analysis of proportions, with reported highest and lowest prevalence according to study left out.

**Supplementary material Table 4 – Laboratory findings of included.**

| Author                    | Year | Laboratory work-up     | Fibrinogen (mg/dl) | D-dimer (ng/ml) | Screening for thrombophilia                                                                                          | Thrombophilia detected | LAC            | anti-cardiolipin | anti-β2 glycoprotein I |
|---------------------------|------|------------------------|--------------------|-----------------|----------------------------------------------------------------------------------------------------------------------|------------------------|----------------|------------------|------------------------|
| Baudar <sup>35</sup>      | 2020 | abnormal               | 420                | 902             | factor II, antithrombin III, protein C, protein S, activated protein C resistance, antiphospholipid antibodies, ANCA | no                     | negative       | negative         | negative               |
| Bolaji <sup>36</sup>      | 2020 | abnormal               | 568                | 477             | factor V, antithrombin III, protein C, protein S, antiphospholipids, ANA                                             | yes                    | positive       | negative         | negative               |
| Cavalcanti <sup>37</sup>  | 2020 | abnormal               |                    | 18902.33        | NA                                                                                                                   |                        |                |                  |                        |
| Chougar <sup>38</sup>     | 2020 | NA                     | NA                 | NA              | yes (undefined)                                                                                                      | no                     | NA             | NA               | NA                     |
| Chow <sup>39</sup>        | 2020 | abnormal               | 352                | 2020            | NA                                                                                                                   | NA                     | NA             | NA               | NA                     |
| Dahl-Cruz <sup>40</sup>   | 2020 | abnormal               | NA                 | 6100            | NA                                                                                                                   | NA                     | NA             | NA               | NA                     |
| Essajee <sup>41</sup>     | 2020 | abnormal               | 520                | 14800           | NA                                                                                                                   | NA                     | NA             | NA               | NA                     |
| Garaci <sup>42</sup>      | 2020 | abnormal               | NA                 | 5975            | NA                                                                                                                   | NA                     | NA             | negative         | negative               |
| Haroon <sup>43</sup>      | 2020 | abnormal               | NA                 | 1020            | normal                                                                                                               | no                     | NA             | NA               | NA                     |
| Hemasian <sup>44</sup>    | 2020 | normal                 | NA                 | NA              | yes (undefined)                                                                                                      | no                     | NA             | NA               | NA                     |
| Hoelscher <sup>45</sup>   | 2020 | NA                     | NA                 | NA              | yes (undefined)                                                                                                      | no                     | NA             | NA               | NA                     |
| Hughes <sup>46</sup>      | 2020 | abnormal               | 490                | NA              | NA                                                                                                                   | NA                     | NA             | NA               | NA                     |
| Kananeh <sup>47</sup>     | 2020 | abnormal               | 429                | 7873            | LAC                                                                                                                  | yes                    | positive       | NA               | NA                     |
| Keaney <sup>48</sup>      | 2020 | abnormal (n=1)         |                    |                 | NA                                                                                                                   | NA                     | NA             | NA               | NA                     |
| Klein <sup>49</sup>       | 2020 | abnormal               | NA                 | 2876            | AT-III, factor V, anti-phospholipids                                                                                 | yes                    | negative       | positive         | positive               |
| Koh <sup>50</sup>         | 2020 | abnormal (n=2)         |                    | NA              | NA                                                                                                                   | NA                     | NA             | NA               | NA                     |
| Malentacchi <sup>51</sup> | 2020 | abnormal               | 539                | 2017            | NA                                                                                                                   | NA                     | NA             | NA               | NA                     |
| Mowla <sup>52</sup>       | 2020 | abnormal               | NA                 | 1533            | NA                                                                                                                   | NA                     | NA             | NA               | NA                     |
| Poillon <sup>53</sup>     | 2020 | abnormal (n=2)         |                    | 1890            | NA                                                                                                                   | NA                     | NA             | NA               | NA                     |
| Rifino <sup>54</sup>      | 2020 | NA                     | NA                 | NA              | NA                                                                                                                   | NA                     | NA             | NA               | NA                     |
| Rouyer <sup>55</sup>      | 2020 | NA                     | NA                 | NA              | NA                                                                                                                   | NA                     | NA             | NA               | NA                     |
| Roy-Gash <sup>56</sup>    | 2020 | abnormal               | 720                | NA              | factor V, antithrombin III, protein C, protein S, antiphospholipids                                                  | no                     | negative       | negative         | negative               |
| Shahjouei <sup>57</sup>   | 2020 | NA                     | NA                 | NA              | NA                                                                                                                   | NA                     | NA             | NA               | NA                     |
| Siegler <sup>58</sup>     | 2020 | NA                     | NA                 | NA              | NA                                                                                                                   | NA                     | NA             | NA               | NA                     |
| Sugiyama <sup>59</sup>    | 2020 | normal                 | NA                 | 1100            | NA                                                                                                                   | NA                     | NA             | NA               | NA                     |
| Thompson <sup>60</sup>    | 2020 | abnormal               | 380                | NA              | LAC, anti-cardiolipin, anti-β2 glycoprotein I                                                                        | yes                    | negative       | positive         | negative               |
| Trimaille <sup>61</sup>   | 2020 | NA                     | NA                 | NA              | NA                                                                                                                   | NA                     | NA             | NA               | NA                     |
| Tu <sup>62</sup>          | 2020 | abnormal (n=1)         | NA                 | 4600            | unspecified                                                                                                          | yes (n=1)              | positive (n=1) | negative         | negative               |
| <b>Overall</b>            |      | 35/41 (85.4%) abnormal | 490.8± 112.9       | 7812.4± 15062.7 | 8/38 (21.1%)                                                                                                         | 5/12 (41.7%)           | 3/8 (37.5%)    | 2/8 (25%)        | 0/8 (0%)               |

Legend. ANA: antinuclear antibodies; ANCA: anti-neutrophil cytoplasm antibodies; LAC: Lupus anti-coagulant; NA: not available.

**Figure 1. Funnel plots for studies addressing cerebral venous thrombosis among patients hospitalized with SARS-CoV-2 (A) and among patients hospitalized with SARS-CoV-2 infection and referred with a cerebrovascular event (B)**

**A**

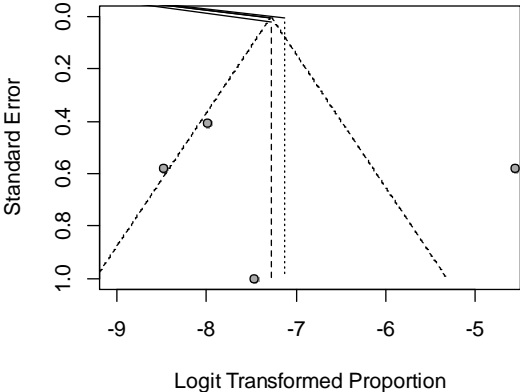

**B**

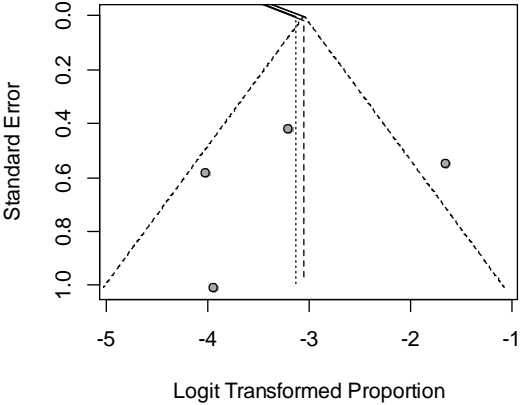

## References for supplementary material

1. Bengler M, Williams O, Siddiqui J, Sztrihla L. Intracerebral haemorrhage and COVID-19: Clinical characteristics from a case series. *Brain Behav Immun*. Elsevier; Epub 2020.:0–1.
2. Bhatia R, Srivastava MVP. COVID-19 and Stroke: Incidental, Triggered or Causative. *Ann Indian Acad Neurol*. 2020;23:318–324.
3. Cheruiyot I, Kipkorir V, Ngure B, Misiani M, Munguti J, Ogeng'o J. Arterial Thrombosis in Coronavirus Disease 2019 Patients: A Rapid Systematic Review. *Ann Vasc Surg*. Epub 2020 Aug.
4. Chougar L, Shor N, Weiss N, et al. Retrospective Observational Study of Brain Magnetic Resonance Imaging Findings in Patients with Acute SARS-CoV-2 Infection and Neurological Manifestations. *Radiology*. Epub 2020 Jul.:202422.
5. Divani AA, Andalib S, Di Napoli M, et al. Coronavirus Disease 2019 and Stroke: Clinical Manifestations and Pathophysiological Insights. *J Stroke Cerebrovasc Dis*. 2020;29.
6. Elnahry AG, Elnahry GA. Management of Idiopathic Intracranial Hypertension during the COVID19 Pandemic. *Rev Recent Clin Trials*. 2020;15.
7. Etkin Y, Conway AM, Silpe J, et al. Acute Arterial Thromboembolism in Patients with COVID-19 in the New York City Area. *Ann Vasc Surg*. Epub 2020 Aug.
8. Fara MG, Stein LK, Skliut M, Morgello S, Fifi JT, Dhamoon MS. Macrothrombosis and stroke in patients with mild Covid-19 infection. *J. Thromb. Haemost*. 2020. p. 2031–2033.
9. Fatima N, Saqqur M, Qamar F, Shaukat S, Shuaib A. Impact of COVID-19 on neurological manifestations: an overview of stroke presentation in pandemic. *Neurol Sci Off J Ital Neurol Soc Ital Soc Clin Neurophysiol*. 2020;41:2675–2679.
10. Favas TT, Dev P, Chaurasia RN, et al. Neurological manifestations of COVID-19: a systematic review and meta-analysis of proportions. *Neurol Sci Off J Ital Neurol Soc Ital Soc Clin Neurophysiol*. Epub 2020 Oct.:1–34.
11. Jiménez-Ruiz A, García-Grimshaw M, Ruiz-Sandoval JL. Neurological manifestations of COVID-19. *Gac Med Mex*. Mexico; 2020;156.
12. Kadono Y, Nakamura Y, Ogawa Y, et al. A case of COVID-19 infection presenting with a seizure following severe brain edema. *Seizure*. Elsevier; 2020;80:53–55.
13. Klein DE, Libman R, Kirsch C, Arora R. Author's response to Letter to the Editor: Anticoagulant approach in COVID-19 patients with cerebral venous thrombosis. *J Stroke Cerebrovasc Dis*. Epub 2020 Jul.:105227.
14. Klok FA, Kruip MJHA, van der Meer NJM, et al. Incidence of thrombotic complications in critically ill ICU patients with COVID-19. *Thromb Res*. Elsevier; 2020;191:145–147.
15. Klok FA, Kruip MJHA, van der Meer NJM, et al. Confirmation of the high cumulative incidence of thrombotic complications in critically ill ICU patients with COVID-19: An updated analysis. *Thromb Res*. Elsevier; Epub 2020.:1–3.
16. Koralnik IJ, Tyler KL. COVID-19: A Global Threat to the Nervous System. *Ann Neurol*. 2020;88:1–11.
17. Kow CS, Zaihan AF, Hasan SS. Anticoagulant approach in COVID-19 patients with cerebral venous thrombosis. *J Stroke Cerebrovasc Dis*. Epub 2020 Aug.:105222.
18. Kremer S, Lersy F, de Sèze J, et al. Brain MRI Findings in Severe COVID-19: A Retrospective Observational Study. *Radiology*. Epub 2020.:202222.
19. Kulick-Soper C V, McKee JL, Wolf RL, et al. Pearls & Oy-sters: Bilateral globus pallidus lesions in a patient with COVID-19. *Neurology*. 2020;95:454–457.
20. Li Y, Li M, Wang M, et al. Acute cerebrovascular disease following COVID-19: a single center,

retrospective, observational study. *Stroke Vasc Neurol*. Epub 2020.:1–6.

21. Lodigiani C, Iapichino G, Carenzo L, et al. Venous and arterial thromboembolic complications in COVID-19 patients admitted to an academic hospital in Milan, Italy. *Thromb Res*. Elsevier Ltd; 2020;191:9–14.
22. Manolis AS, Manolis TA, Manolis AA, Papatheou D, Melita H. COVID-19 Infection: Viral Macro- and Micro-Vascular Coagulopathy and Thromboembolism/Prophylactic and Therapeutic Management. *J Cardiovasc Pharmacol Ther*. Epub 2020 Sep 14.:107424842095897.
23. Mi B, Chen L, Tong D, et al. Delayed surgery versus nonoperative treatment for hip fractures in post-COVID-19 arena: a retrospective study of 145 patients. *Acta Orthop*. Epub 2020 Sep 8.:1–5.
24. Patel HN, Syed A, Lobel JS, et al. Cerebellar infarction requiring surgical decompression in patient with COVID 19 pathological analysis and brief review. *Interdiscip. Neurosurg. Adv. Tech. case Manag*. 2020. p. 100850.
25. Román GC, Spencer PS, Reis J, et al. The neurology of COVID-19 revisited: A proposal from the Environmental Neurology Specialty Group of the World Federation of Neurology to implement international neurological registries. *J Neurol Sci*. 2020;414:116884.
26. Roy-Gash F, De Mesmay M, Devys J-M, Vespignani H, Blanc R, Engrand N. Correction to: COVID-19-associated acute cerebral venous thrombosis: clinical, CT, MRI and EEG features. *Crit Care*. 2020;24:528.
27. Shakibajahromi B, Borhani-Haghighi A, Haseli S, Mowla A. Cerebral venous sinus thrombosis might be under-diagnosed in the COVID-19 era. *eNeurologicalSci*. 2020;20:14–16.
28. Speeckaert MM, Speeckaert R, Delanghe JR. Potential underlying mechanisms of cerebral venous thrombosis associated with COVID-19. *J Neuroradiol*. Elsevier Masson SAS; Epub 2020.:1033–1034.
29. Suri JS, Puvvula A, Biswas M, et al. COVID-19 pathways for brain and heart injury in comorbidity patients: A role of medical imaging and artificial intelligence-based COVID severity classification: A review. *Comput Biol Med*. 2020;124:103960.
30. Sweid A, Hammoud B, Bekelis K, et al. EXPRESS: Brain ischemic and hemorrhagic complications of COVID-19. *Int J Stroke*. Epub 2020.:1747493020937189.
31. Vinayagam S, Sattu K. SARS-CoV-2 and coagulation disorders in different organs. *Life Sci*. 2020;260:118431.
32. Warkentin TE, Kaatz S. COVID-19 versus HIT hypercoagulability. *Thromb Res*. 2020;196:38–51.
33. Zavras PD, Kabarriti R, Mehta V, Goel S, Billett HH. Clinical Thrombosis Rate was not Increased in a Cohort of Cancer Patients with COVID-19. *medRxiv Prepr Serv Heal Sci*. Epub 2020 Sep 18.
34. Zhou Z, Kang H, Li S, Zhao X. Understanding the neurotropic characteristics of SARS-CoV-2: from neurological manifestations of COVID-19 to potential neurotropic mechanisms. *J Neurol*. Springer Berlin Heidelberg; 2020;267:2179–2184.
35. Baudar C, Duprez T, Kassab A, Miller N, Rutgers MP. COVID-19 as triggering co-factor for cortical cerebral venous thrombosis? *J Neuroradiol*. Elsevier Masson SAS; Epub 2020.
36. Bolaji P, Kukoyi B, Ahmad N, Wharton C. Extensive cerebral venous sinus thrombosis: a potential complication in a patient with COVID-19 disease. *BMJ Case Rep*. 2020;13.
37. Cavalcanti DD, Raz E, Shapiro M, et al. Cerebral venous thrombosis associated with COVID-19. *Am J Neuroradiol*. United States; 2020;41:1–7.
38. Chougar L, Mathon B, Weiss N, Degos V, Shor N. Atypical Deep Cerebral Vein Thrombosis with Hemorrhagic Venous Infarction in a Patient Positive for COVID-19. *Am J Neuroradiol*. United States; 2020;41:1–3.
39. Chow LC, Chew LP, Leong TS, Mohamad Tazuddin EE, Chua HH. Thrombosis and Bleeding as



Presentation of COVID-19 Infection with Polycythemia Vera. A Case Report. *SN Compr Clin Med*. Epub 2020.

40. Dahl-Cruz F, Guevara-Dalrymple N, López-Hernández N. [Cerebral venous thrombosis and SARS-CoV-2 infection]. *Rev. Neurol. Spain*; 2020. p. 391–392.
41. Essajee F, Solomons R, Goussard P, Van Toorn R. Child with tuberculous meningitis and COVID-19 coinfection complicated by extensive cerebral sinus venous thrombosis. *BMJ Case Rep*. 2020;13:e238597.
42. Garaci F, Di Giuliano F, Picchi E, Da Ros V, Floris R. Venous cerebral thrombosis in COVID-19 patient. *J Neurol Sci*. Elsevier; 2020;414:116871.
43. Haroon KH, Muhammad A, Hussain S, Patro SN. COVID-19 Related Cerebrovascular Thromboembolic Complications in Three Young Patients. *Case Rep Neurol*. Epub 2020.:321–328.
44. Hemasian H, Ansari B. First case of Covid-19 presented with cerebral venous thrombosis: A rare and dreaded case. *Rev Neurol (Paris)*. Elsevier Masson SAS; 2020;176:521–523.
45. Hoelscher C, Sweid A, Ghosh R, et al. Cerebral deep venous thrombosis and COVID-19: case report. *J Neurosurg*. Epub 2020 Sep.:1–4.
46. Hughes C, Nichols T, Pike M, Subbe C, Elghenzai S. Cerebral Venous Sinus Thrombosis as a Presentation of COVID-19. *Eur J case reports Intern Med*. 2020;7:1691.
47. Kananeh MF, Thomas T, Sharma K, et al. Arterial and venous strokes in the setting of COVID-19. *J Clin Neurosci Off J Neurosurg Soc Australas*. 2020;79:60–66.
48. Keaney K, Mumtaz T. Cerebral venous thrombosis in patients with severe COVID-19 infection in intensive care. *Br J Hosp Med*. 2020;81:1–4.
49. Klein DE, Libman R, Kirsch C, Arora R. Cerebral venous thrombosis: A typical presentation of COVID-19 in the young. *J Stroke Cerebrovasc Dis*. Elsevier Inc.; 2020;29:104989.
50. Koh JS, De Silva DA, Quek AML, et al. Neurology of COVID-19 in Singapore. *J Neurol Sci*. 2020;418:117118.
51. Malentacchi M, Gned D, Angelino V, et al. Concomitant brain arterial and venous thrombosis in a COVID-19 patient. *Eur J Neurol*. 2020;27.
52. Mowla A, Shakibajahromi B, Shahjouei S, et al. Cerebral venous sinus thrombosis associated with SARS-CoV-2; a multinational case series. *J Neurol Sci*. 2020;419:117183.
53. Poillon G, Obadia M, Perrin M, Savatovsky J, Lecler A. Cerebral venous thrombosis associated with COVID-19 infection: Causality or coincidence? *J. Neuroradiol. = J. Neuroradiol*. 2020.
54. Rifino N, Censori B, Agazzi E, et al. Neurologic manifestations in 1760 COVID-19 patients admitted to Papa Giovanni XXIII Hospital, Bergamo, Italy. *J Neurol*. Epub 2020 Oct 7.
55. Rouyer O, Pierre-Paul I-N, Balde A, et al. High prevalence of deep venous thrombosis in non-severe COVID-19 patients hospitalized for a neurovascular disease. *medRxiv*. Epub 2020.:2020.09.03.20187344.
56. Roy-Gash F, Marine DM, Jean-Michel D, Herve V, Raphael B, Nicolas E. COVID-19-associated acute cerebral venous thrombosis: Clinical, CT, MRI and EEG features. *Crit Care. Critical Care*; 2020;24:1–3.
57. Shahjouei S, Naderi S, Li J, et al. Risk of stroke in hospitalized SARS-CoV-2 infected patients: A multinational study. *EBioMedicine*. 2020;59:102939.
58. Siegler JE, Cardona P, Arenillas JF, et al. Cerebrovascular events and outcomes in hospitalized patients with COVID-19: The SVIN COVID-19 Multinational Registry. *Int J stroke Off J Int Stroke Soc*. Epub 2020 Sep.:1747493020959216.
59. Sugiyama Y, Tsuchiya T, Tanaka R, et al. Cerebral venous thrombosis in COVID-19-associated

coagulopathy: A case report. *J. Clin. Neurosci. Off. J. Neurosurg. Soc. Australas.* 2020. p. 30–32.

60. Thompson A, Morgan C, Smith P, et al. Cerebral venous sinus thrombosis associated with COVID-19. *Pract Neurol.* Epub 2020 Oct 8.
61. Trimaille A, Curtiaud A, Marchandot B, et al. Venous thromboembolism in non-critically ill patients with COVID-19 infection. *Thromb Res.* 2020;193:166–169.
62. Tu TM, Goh C, Tan YK, et al. Cerebral Venous Thrombosis in Patients with COVID-19 Infection: a Case Series and Systematic Review. *J Stroke Cerebrovasc Dis.* 2020;29:1–9.
